# Supplementary material for: The metabolic footprint of aging in mice
Source: PubMed Central journal article supplement — Sci Rep. 2011 Oct 31;1:134. doi: 10.1038/srep00134 (PMC3216615; doi:10.1038/srep00134), 2011-10-31
Supplement: srep00134-s1.pdf [file srep00134-s1.pdf]

## Supplementary data

### The metabolic footprint of aging in mice

Riekelt H. Houtkooper<sup>1</sup>, Carmen Argmann<sup>2</sup>, Sander M. Houten<sup>3</sup>, Carles Cantó<sup>1</sup>, Ellen H. Jeninga<sup>1</sup>, Pénélope A. Andreux<sup>1</sup>, Charles Thomas<sup>4</sup>, Raphaël Doenlen<sup>4</sup>, Kristina Schoonjans<sup>1</sup>, Johan Auwerx<sup>1\*</sup>

FIGURE S1

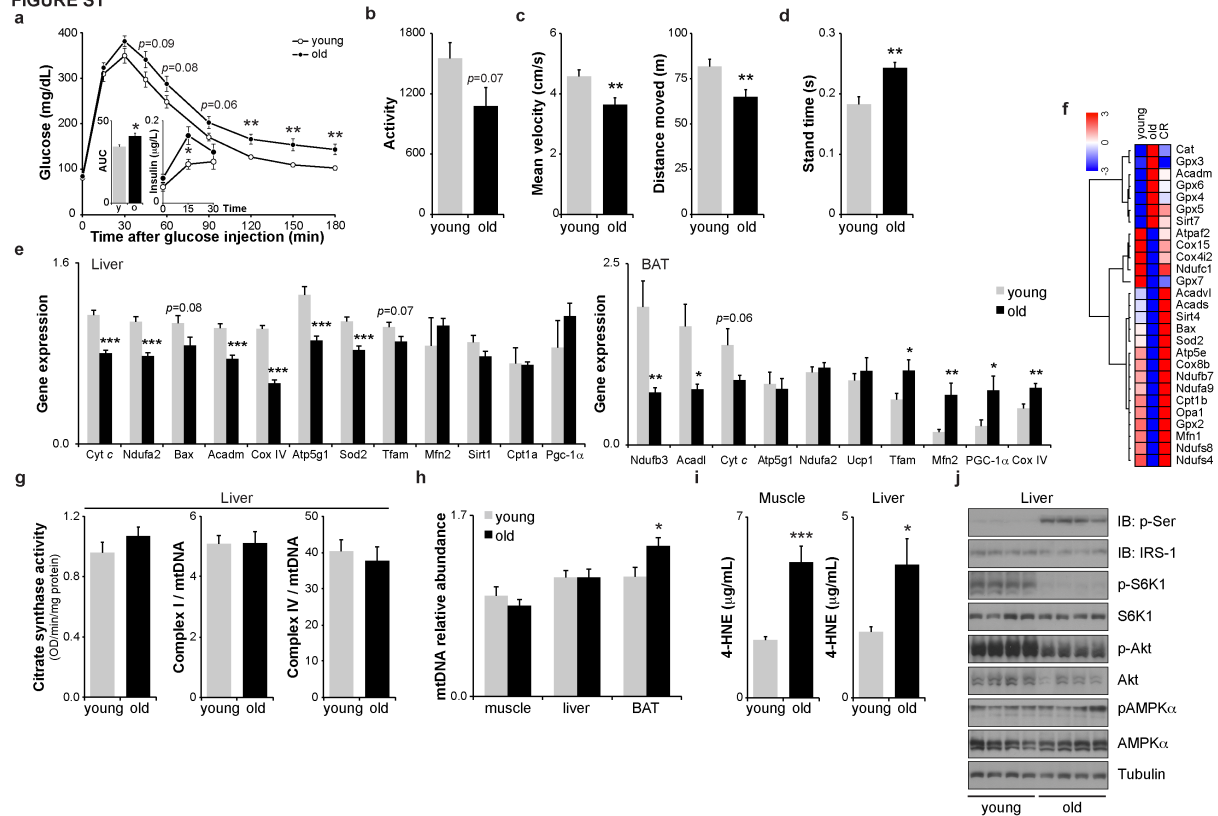

**Figure S1. Clinical and molecular phenotyping of aged mice.** (a) Glucose tolerance after intraperitoneal glucose injection. The insets show the area under the curve (AUC) of the glucose levels (left panel) and the plasma insulin levels during the first 30 minutes of the glucose tolerance test. (b) Activity during 24h indirect calorimetry recording. (c) Velocity and total distance moved in a square open-field test. (d) Stand time —time standing on one paw— during gait analysis. (e) Gene expression of young and old mice in liver and brown adipose tissue (BAT). (f) Heat map showing gene expression differences for selected (mitochondrial) genes between young (5 months), old (25 months) and caloric restricted C57BL/6N mice from published microarray datasets (Edwards et al., 2007). (g) Enzymatic activity of citrate synthase (CS), and complex I and complex IV of oxidative phosphorylation in liver. (h) mtDNA abundance in various tissues. (i) Tissue ROS damage as determined by 4-hydroxynonenal (4-HNE). (j) Western blot analysis of relevant metabolic signaling pathways in liver. pAMPK $\alpha$  represents phosphorylation/activation of the  $\alpha$ -subunit of AMPK; Immunoprecipitated IRS1 was used to measure its phosphorylation on serine residues (p-Ser); p-S6K1 reflects S6K1 phosphorylation/activation. Tubulin is used as a loading control. Values are expressed as mean $\pm$ SEM; n=6-10. \*  $p < 0.05$ ; \*\*  $p < 0.01$ ; \*\*\*  $p < 0.001$ .

**FIGURE S2**

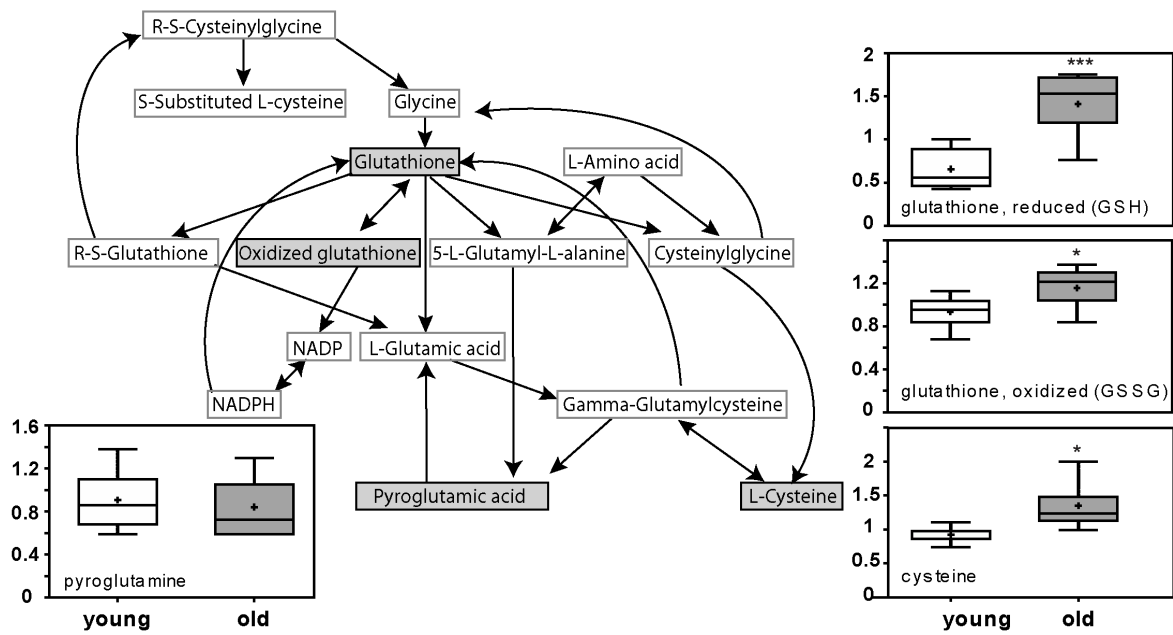

**Figure S2. Glutathione pathway is disturbed in aging liver.** The glutathione metabolic pathway is an example of a metabolic pathway where a key node, glutathione, has been altered in aging mice, which impacts many possible biological outcomes as demonstrated by the respective box plots of down stream metabolites.

**FIGURE S3**

**Muscle poly-unsaturated fatty acid metabolism**

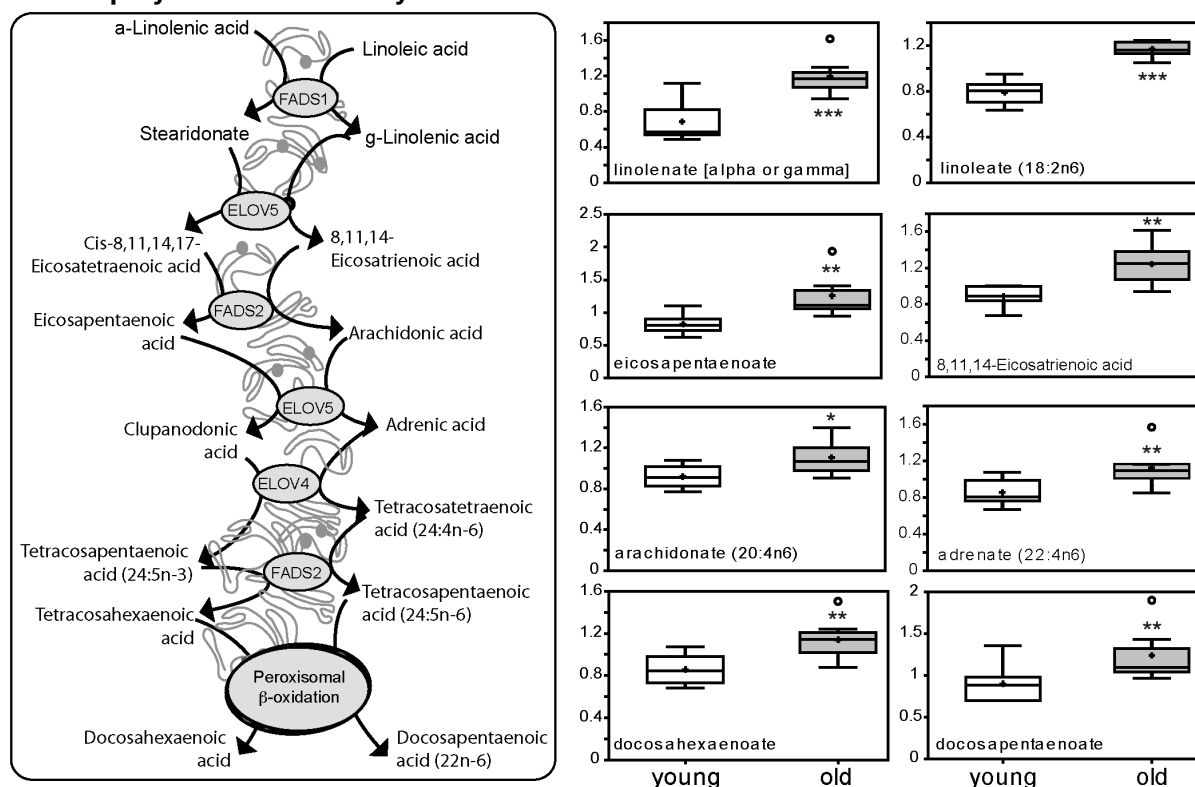

**Figure S3. Polyunsaturated fatty acid pathway is disturbed in aging muscle.** The polyunsaturated biosynthetic pathway is an example of a metabolic pathway where key nodes, linolenic and linoleic acid, have been altered in aging mice, which impacts many possible biological outcomes as demonstrated by the respective box plots of down stream metabolites.

## Supplementary methods

Primer sequences for quantitative PCR and mtDNA analysis.

For RNA:

| Gene                            | Forward primer            | Reverse primer             |
|---------------------------------|---------------------------|----------------------------|
| <i>Atp5g1</i>                   | GCTGCTTGAGAGATGGGTTC      | AGTTGGTGTGGCTGGATCA        |
| <i>Bax</i>                      | TGGAGCTGCAGAGGATGATTG     | CACGGAGGAAGTCCAGTGTC       |
| <i>Cox IV</i>                   | TGGGAGTGTTGTGAAGAGTGA     | GCAGTGAAGCCGATGAAGAAC      |
| <i>Cpt1a</i>                    | GCACTGCAGCTCGCACATTACAA   | CTCAGACAGTACCTCCTTCAGGAAA  |
| <i>Cpt1b</i>                    | CCCATGTGCTCCTACCAGAT      | CCTTGAAGAAGCGACCTTTG       |
| <i>Cyt c</i>                    | TCCATCAGGGTATCCTCTCC      | GGAGGCAAGCATAAGACTGG       |
| <i>Lcad</i>                     | GTAGCTTATGAATGTGTGCAACTC  | GTCTTGCAGTACAGCTCTTTCATTA  |
| <i>Mcad</i>                     | GGCCATTAAGACCAAAGCAGA     | GTGTCGGCTTCCACAATGAAT      |
| <i>Mfn2</i>                     | ACGTCAAAGGGTACCTGTCCA     | CAATCCCAGATGGCAGAACTT      |
| <i>Ndufa2</i>                   | GCACACATTTCCCCACACTG      | CCCAACCTGCCATTCTGAT        |
| <i>Ndufb3</i>                   | TACCACAAACGCAGCAAACC      | AAGGGACGCCATTAGAAACG       |
| <i>Pgc-1<math>\alpha</math></i> | AAGTGTGGAAGTCTCTGGAAGT    | GGGTTATCTTGGTTGGCTTTATG    |
| <i>Sirt1</i>                    | TGTGAAGTACTGCAGGAGTGATAA  | GCATAGATACCGTCTCTTGATCTGAA |
| <i>Sod2</i>                     | CTCTGGCCAAGGGAGATGTTA     | ACGGCTGTCAGCTTCTCCTTA      |
| <i>Tfam</i>                     | AAGTGTTTTTCCAGCATGGG      | GGCTGCAATTTTCCCTAACCA      |
| <i>Ucp1</i>                     | CTTTGCCTCACTCAGGATTGG     | ACTGCCACACCTCCAGTCATT      |
| <i>Ucp3</i>                     | ACTCCAGCGTCGCCATCAGGATTCT | TAAACAGGTGAGACTCCAGCAACTT  |

For mtDNA:

| Gene        | Forward primer          | Reverse primer        |
|-------------|-------------------------|-----------------------|
| <i>16s</i>  | CCGCAAGGGAAAGATGAAAGAC  | TCGTTTGGTTTCGGGGTTTC  |
| <i>Cox2</i> | GTTGATAACCGAGTCGTTCTGC  | CCTGGGATGGCATCAGTTTT  |
| <i>Ucp2</i> | CTACAGATGTGGTAAAGGTCCGC | GCAATGGTCTTGTAGGCTTCG |
| <i>Hk2</i>  | TCTGGCTCTGAGATCCATCTTCA | CCGGCCTCTTAACCACTTCC  |

## References to supplementary data

Edwards, M.G., Anderson, R.M., Yuan, M., Kendzioriski, C.M., Weindruch, R., and Prolla, T.A. (2007). Gene expression profiling of aging reveals activation of a p53-mediated transcriptional program. *BMC Genomics* 8, 80.
